# Supplementary material
Source: PubMed Central journal article supplement (PMC6659117)

# Supplemental Figure 1

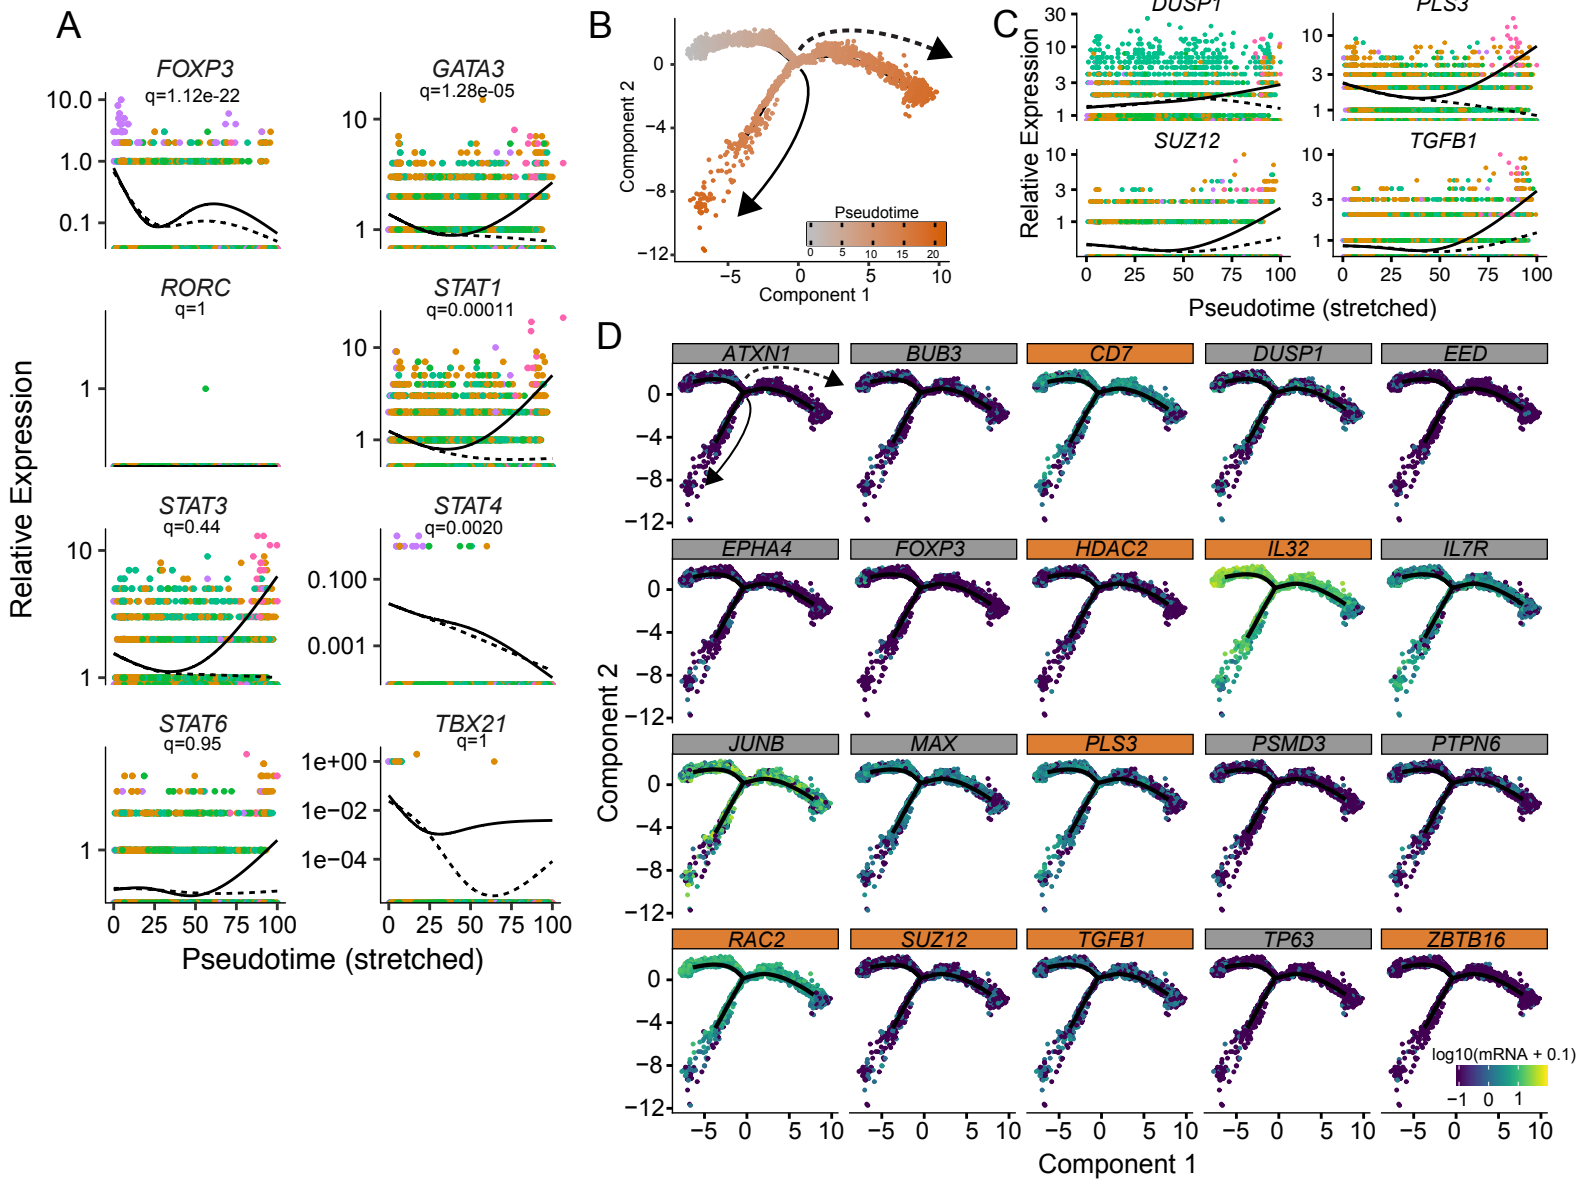

Supplement: NIHMS1520591-supplement-2.pdf [file NIHMS1520591-supplement-2.pdf]
